# Supplementary material
Source: PubMed Central journal article supplement (PMC1851846)
Supplement: plntphys_pp.106.094334_1.pdf [file plntphys_pp.106.094334_1.pdf]

Supplementary online material:

*Assessment of transgene stability and transmission:*

A small subset of the transgenic events produced significantly more than the 50% expected herbicide resistant plants. There are multiple explanations for the transgenic events that have altered frequencies of resistant plants when crossing hemizygous transgenics to non-transgenic plants. The lines that show a higher than expected frequency of resistant plants are likely due to the presence of multiple unlinked copies of the transgene. Several examples of multiple transgenic loci segregating were observed by the Southern blot analysis. This type of aberrant segregation ratio was resolved by selecting one of the two transgenic loci, thus restoring the expected segregation ratio for the transgenic line.

A significant proportion (~1/4) of the transgenic events generated by this project displayed lower than expected frequencies of resistant plants upon outcrossing (SOM Figure 1B). By separately plotting the number of resistant plants per family, it became obvious that there were some individual families that were all sensitive and may have skewed the summary data (SOM Figure 2A). By separately visualizing the resistance data for all of the rows grown for each transgenic event (multiple rows, representing multiple crosses grown over multiple generations and locations), it was possible to determine the relatively stability of each event and the contribution of different rows to the total. For any given construct, there was variation in the stability among different transgenic events (SOM Figure 2B-D). For example, events 3832.004 or 3832.007 are quite stable and never produced rows with all susceptible plants while other events, such as 3832.001 or 3832.014, are unstable and frequently produced rows with lower than expected frequencies of resistant plants.

One source of variability could be the directionality of outcrossing if the transgene is inherently more stable when transmitted through the male or female parent. Across all events, results indicated that the transgenes are less stable when transmitted through the male (41.4% resistant plants in 39,855 plants) than when transmitted through the female parent (45.0% resistant plants in 43,230 plants). In some events, such as 3385.016 (SOM Figure 2C), the transgene appeared stable when transmitted through one

parent but not the other. There are a number of potential sources of variability in the combined data represented in SOM Figure 2: the sex of the transmitting parent varied in different families, and the data were compiled from multiple field locations (with different personnel scoring the resistance phenotypes), multiple generations of transgenic plants, and variable numbers of plants in each family in each planting.

To standardize the screen for parent-of-origin effects on transgene stability, another study was conducted. In the summer of 2003, resistant plants from 123 transgenic events were crossed as females by non-transgenic B73. A total of 223 ears were generated (including 27 events with a single ear and 95 events with multiple ears derived from sibling transgenic female parents). Sixty seeds from each ear were grown in standard greenhouse conditions and the seedlings were screened for herbicide resistance after 14 days of growth (SOM Figure 3A). A number of the ears (42/223) produced a lower than expected percentage of resistant seedlings ( $X^2 < 0.05$ ). Only 5/223 ears produced significantly higher than expected resistant seedling; this is approximately the number of statistical false-positives expected for this population size.

Another experiment was directed at asking whether transmission from male vs. female parent influenced the proportion of resistant progeny (Figure 5 and SOM Table II, Experiment 1). For each of 22 randomly selected events, a single hemizygous transgenic plant was crossed reciprocally (as male and female) with a non-transgenic B73 plant generating 44 ears. Sixty seeds from each reciprocal-cross ear were planted during the summer of 2004 and scored for herbicide resistance. For 16 of the 22 events, parental origin of the transgene did not significantly affect the proportion of resistant progeny (Figure 5). However, for five events, transmission of the transgene through the male led to a significantly lower proportion of resistant progeny than when the same transgene was transmitted from a female parent (indicated by black arrows in Figure 5). For one event, 3571.022, the opposite was true, *e.g.*, transmission from a female parent led to lower resistance in the progeny than when the transgene was inherited from a male parent (indicated by open arrow in Figure 5). In general, there were more instances of lower than expected resistant progeny in male transmitted rows than in female transmitted rows (SOM Table II).

This apparent bias against male transmission could be the result of reduced transmission of transgenic pollen or preferential silencing in the male germline. Because the male inflorescence (tassel) is formed later in development than the female inflorescence (ear), it is possible that progressive transgene silencing during later stages of development contributes to the bias against male transmission. For Experiment 1 (SOM Table II), the transgenic parent plants had been screened by performing a leaf painting assay on seedlings to identify resistant plants. To evaluate the potential effect of progressive silencing through development, we conducted a second experiment in which the parental transgenic plants were tested for resistance by spraying the entire plant at three different times during plant development: at the 5-6 leaf stage, at the 10-12 leaf stage and finally just prior to tassel emergence. Some plants that survived the first or second herbicide application exhibited sensitivity at the third application, which likely indicates silencing of the transgene late in development. In the absence of late herbicide application, crossing of such a plant would lead to transmission of a silent transgene to resulting progeny. However, by applying selection for resistance late in development, we reasoned that plants undergoing progressive transgene silencing would be killed and would not be used for crossing. To test this idea, for a set of 73 independent events (including most of the 22 events used for the first experiment), we performed reciprocal crosses to B73 for two sibling plants that survived the third herbicide application. Thirty seeds from each resulting ear were grown in the greenhouse and the seedlings were screened for resistance by whole-plant spraying after 14 days of growth (SOM Table II, Experiment 2). A total of 9,382 seedlings were screened. The proportion of resistant plants was higher in this experiment (48.0% compared to 38.2% in the first experiment). We attribute this to the more rigorous screening for resistance in the previous generation, which probably selected against plants in which progressive transgene silencing was occurring. Although fewer lines displayed unexpected segregation ratios in this experiment (7.5% of lines, compared to 39% in the first experiment), there were still some lines with lower than expected resistance frequencies. Again, this was more common in progeny where the transgene was transmitted through the male.

A skewed proportion of herbicide resistant progeny, depending upon the transmitting parent, could be due either to erratic transmission of the transgene or to poor

expression of the *bar* gene, perhaps through transgene silencing. To distinguish between these possibilities, we isolated DNA from herbicide susceptible individuals in 78 families, including the events that yielded lower than expected frequencies of resistant plants in the experiments above, and used PCR to look for the presence of the transgene (SOM Table III). If the low frequency of resistance was due to transgene silencing, then some of the susceptible plants should have the transgene, whereas if the low frequency of resistance was due to problems in transmission, then the transgene should not be detected in susceptible plants. Of the 78 families tested, 24 families had no resistant plants and 54 families had a lower than expected number of resistant plants (SOM Table III). In 44 of the 78 families, the transgene was not detected in any of the herbicide susceptible plants, suggesting that the cause of low proportions of resistant plants was due to poor transmission of the transgene. In the other 34 families, the transgene was detected in at least one of the susceptible plants, suggesting that the cause of low proportions of herbicide resistant plants in these events is attributable to low levels of expression of the *bar* transgene, silencing of the transgene or a combination of these mechanisms. In some cases (6 of these 34 families) the low proportion of susceptible plants that exhibit presence of the transgene suggests that both reduced transmission, in addition to transgene silencing, may contribute to the reduced frequency of resistant plants (Table S3).

SOM Figure 1. Analysis of transgene stability by construct and by event. (A) The data from all field seasons were grouped based on the construct used to perform transformation. The percent resistant plants for multiple generations and constructs was tabulated for each event. (B) The percent resistant plants was determined for each event that included at least 8 plants. The data for each event can include scoring for multiple field seasons and multiple generations of transgenic plants.

SOM Figure 2. Analysis of transgene stability by event. (A) The percent resistant plants for all rows with at least eight plants was determined and plotted on the y-axis. Each row was plotted along the x-axis according to the transgenic event number. The red points indicate rows in which the transgene was transmitted through the female parent and the

blue points indicate rows in which the transgene was transmitted through the male parent. A small amount of “jitter” was applied to the plot to allow visualization of overlapping data points. (B) An expanded version of this plot was produced for the empty vector control and three different constructs. The event number is indicated along the bottom of the x-axis.

SOM Figure 3. Transgene stability in a controlled set of events. (A) Sixty seeds were planted and screened for herbicide resistance. The data are sorted according the percent resistance and plotted with a separate bar for each packet of seeds that were analyzed. The lines indicate the point at which the data are significantly different from expected at a chi-square value  $<0.05$ . (B) The correlation between the multiple generations or planting from the same event was assessed. Each vertical line along the X axis represents a different transgenic event. The y-axis indicates the percentage of plants that displayed BAR resistance for each row that was planted in the field. The blue spots indicate a chi-square significant value ( $P<0.05$ ). Note that in many cases there is correlation between different rows of plants derived from the same event.

SOM Table I. Transformation pipeline and efficiencies for producing transgenic lines used in this study.

| Target gene name  | Unique MGC number | Embryo plates shot (25 embryos/plate) | Resistant callus events | T0 plantlets regenerated and transferred to greenhouse | Plants that made T1 seed | % efficiency from callus to T1 seed |
|-------------------|-------------------|---------------------------------------|-------------------------|--------------------------------------------------------|--------------------------|-------------------------------------|
| <i>brd101</i>     | 5013              | 20                                    | 8                       | 5                                                      | 2                        | 25                                  |
| <i>brd102</i>     | 5912              | 18                                    | 9                       | 5                                                      | 2                        | 22                                  |
| <i>brd103</i>     | 5297              | 20                                    | 20                      | 8                                                      | 7                        | 35                                  |
| <i>chb101</i>     | 5812              | 20                                    | 25                      | 12                                                     | 10                       | 40                                  |
| <i>chc101</i>     | 3348              | 13                                    | 8                       | 8                                                      | 4                        | 50                                  |
| <i>che101</i>     | 6271              | 17                                    | 13                      | 3                                                      | 1                        | 8                                   |
| <i>chr101/106</i> | 2758              | 57                                    | 15                      | 15                                                     | 10                       | 67                                  |
| <i>chr101</i>     | 3882              | 49                                    | 36                      | 17                                                     | 14                       | 39                                  |
| <i>chr106</i>     | 3768              | 25                                    | 10                      | 2                                                      | 0                        | 0                                   |
| <i>chr110</i>     | 2960              | 61                                    | 13                      | 4                                                      | 3                        | 23                                  |
| <i>chr112</i>     | 3385              | 63                                    | 32                      | 18                                                     | 13                       | 41                                  |
| <i>chr113</i>     | 3928              | 38                                    | 5                       | 2                                                      | 0                        | 0                                   |
| <i>chr115</i>     | 6432              | 23                                    | 49                      | 27                                                     | 17                       | 35                                  |
| <i>chr118</i>     | 3832              | 40                                    | 24                      | 16                                                     | 11                       | 46                                  |
| <i>chr119</i>     | 3491              | 29                                    | 22                      | 8                                                      | 4                        | 18                                  |
| <i>chr120</i>     | 3353              | 46                                    | 20                      | 6                                                      | 3                        | 15                                  |
| <i>chr122</i>     | 4191              | 24                                    | 19                      | 19                                                     | 15                       | 79                                  |
| <i>chr124</i>     | 4943              | 14                                    | 5                       | 2                                                      | 0                        | 0                                   |
| <i>chr125</i>     | 5211              | 34                                    | 26                      | 14                                                     | 11                       | 42                                  |
| <i>chr126</i>     | 5305              | 30                                    | 9                       | 4                                                      | 3                        | 33                                  |
| <i>chr131</i>     | 6091              | 20                                    | 7                       | 3                                                      | 2                        | 29                                  |
| <i>crd101</i>     | 5752              | 53                                    | 23                      | 6                                                      | 3                        | 13                                  |
| <i>dmt101</i>     | 2685              | 86                                    | 11                      | 10                                                     | 8                        | 73                                  |
| <i>dmt102</i>     | 3471              | 59                                    | 11                      | 9                                                      | 5                        | 45                                  |
| <i>dmt103</i>     | 2822              | 27                                    | 10                      | 10                                                     | 8                        | 80                                  |
| <i>dmt104</i>     | 3944              | 24                                    | 8                       | 8                                                      | 5                        | 63                                  |
| <i>dmt106</i>     | 5943              | 15                                    | 32                      | 18                                                     | 6                        | 19                                  |
| <i>epl101</i>     | 5652              | 44                                    | 14                      | 6                                                      | 3                        | 21                                  |
| <i>fie102</i>     | 5663              | 42                                    | 10                      | 2                                                      | 2                        | 20                                  |
| <i>gta101</i>     | 4618              | 20                                    | 9                       | 3                                                      | 2                        | 22                                  |
| <i>gta107</i>     | 5936              | 17                                    | 12                      | 4                                                      | 3                        | 25                                  |
| <i>gtb101</i>     | 5321              | 21                                    | 4                       | 2                                                      | 1                        | 25                                  |
| <i>gtc102</i>     | 4761              | 20                                    | 12                      | 5                                                      | 4                        | 33                                  |
| <i>gtc102</i>     | 4992              | 62                                    | 18                      | 7                                                      | 4                        | 22                                  |
| <i>gte101</i>     | 3932              | 24                                    | 9                       | 6                                                      | 3                        | 33                                  |
| <i>gte102</i>     | 5231              | 20                                    | 37                      | 17                                                     | 12                       | 32                                  |
| <i>hac101</i>     | 3826              | 36                                    | 11                      | 10                                                     | 7                        | 64                                  |
| <i>hag101</i>     | 4681              | 32                                    | 35                      | 17                                                     | 14                       | 40                                  |
| <i>hag102</i>     | 4291              | 41                                    | 26                      | 11                                                     | 10                       | 38                                  |
| <i>hag103</i>     | 4361              | 31                                    | 20                      | 6                                                      | 4                        | 20                                  |

|         |      |    |    |    |    |    |
|---------|------|----|----|----|----|----|
| ham101  | 4202 | 26 | 37 | 17 | 12 | 32 |
| hda101  | 3751 | 33 | 34 | 12 | 7  | 21 |
| hda102  | 4571 | 40 | 43 | 21 | 13 | 30 |
| hda108  | 4671 | 33 | 11 | 3  | 3  | 27 |
| hda109  | 4162 | 24 | 9  | 7  | 6  | 67 |
| hda110  | 3534 | 67 | 18 | 5  | 5  | 28 |
| hdt101  | 3955 | 30 | 42 | 12 | 7  | 17 |
| hdt103  | 3361 | 13 | 5  | 5  | 3  | 60 |
| hmga102 | 4977 | 20 | 18 | 5  | 4  | 22 |
| hmgb101 | 4301 | 20 | 21 | 9  | 6  | 29 |
| hmgb102 | 5924 | 21 | 9  | 5  | 2  | 22 |
| hmgb103 | 4963 | 20 | 22 | 14 | 11 | 50 |
| hmgb104 | 4172 | 26 | 24 | 8  | 4  | 17 |
| hmgb106 | 5071 | 25 | 33 | 17 | 13 | 39 |
| hmgb108 | 6281 | 20 | 33 | 8  | 5  | 15 |
| hmgb110 | 6102 | 20 | 2  | 1  | 0  | 0  |
| hmgb113 | 6151 | 21 | 45 | 23 | 12 | 27 |
| hon101  | 5736 | 20 | 9  | 2  | 0  | 0  |
| hon102  | 5065 | 54 | 90 | 49 | 35 | 39 |
| hon103  | 6082 | 21 | 29 | 18 | 10 | 34 |
| hon104  | 5094 | 20 | 7  | 2  | 2  | 29 |
| hon110  | 6123 | 19 | 25 | 14 | 12 | 48 |
| hxa102  | 3544 | 71 | 45 | 13 | 9  | 20 |
| mbd101  | 3818 | 46 | 44 | 13 | 11 | 25 |
| mbd105  | 5052 | 40 | 28 | 12 | 3  | 11 |
| mbd108  | 4585 | 40 | 13 | 5  | 5  | 38 |
| mbd109  | 5832 | 45 | 70 | 38 | 27 | 39 |
| mbd113  | 6311 | 20 | 21 | 10 | 7  | 33 |
| nfa101  | 3772 | 24 | 33 | 14 | 8  | 24 |
| nfa102  | 4707 | 20 | 10 | 6  | 4  | 40 |
| nfa104  | 3322 | 11 | 7  | 7  | 5  | 71 |
| nfc102  | 3480 | 36 | 10 | 8  | 7  | 70 |
| nfc103  | 3331 | 17 | 6  | 6  | 4  | 67 |
| nfc104  | 4271 | 31 | 24 | 10 | 9  | 38 |
| nfe101  | 6071 | 20 | 39 | 21 | 9  | 23 |
| nfe101  | 6199 | 20 | 22 | 9  | 5  | 23 |
| sdg101  | 4795 | 38 | 15 | 6  | 3  | 20 |
| sdg102  | 4268 | 44 | 36 | 20 | 13 | 36 |
| sdg103  | 4322 | 25 | 28 | 12 | 9  | 32 |
| sdg104  | 4281 | 38 | 23 | 18 | 11 | 48 |
| sdg105  | 5171 | 33 | 36 | 15 | 13 | 36 |
| sdg106  | 4716 | 16 | 10 | 3  | 3  | 30 |
| sdg107  | 5104 | 24 | 20 | 8  | 7  | 35 |
| sdg108  | 6238 | 18 | 52 | 19 | 8  | 15 |
| sdg110  | 4621 | 16 | 20 | 6  | 5  | 25 |
| sdg111  | 4721 | 37 | 15 | 6  | 3  | 20 |
| sdg113  | 4633 | 16 | 8  | 2  | 2  | 25 |
| sdg115  | 4985 | 20 | 13 | 5  | 3  | 23 |
| sdg116  | 4731 | 16 | 9  | 4  | 2  | 22 |
| sdg117  | 4656 | 36 | 24 | 10 | 7  | 29 |
| sdg118  | 5314 | 65 | 17 | 3  | 3  | 18 |

|                            |      |     |     |    |    |    |
|----------------------------|------|-----|-----|----|----|----|
| <i>sdg119</i>              | 5511 | 20  | 36  | 9  | 5  | 14 |
| <i>sdg122</i>              | 5801 | 20  | 42  | 22 | 14 | 33 |
| <i>sdg123</i>              | 5825 | 20  | 24  | 14 | 12 | 50 |
| <i>sdg124</i>              | 5641 | 53  | 48  | 22 | 14 | 29 |
| <i>sdg125</i>              | 6321 | 19  | 10  | 6  | 3  | 30 |
| <i>sdg129</i>              | 6180 | 20  | 22  | 7  | 4  | 18 |
| <i>sga101</i>              | 6468 | 20  | 10  | 4  | 4  | 40 |
| <i>sgb101</i>              | 3846 | 112 | 149 | 51 | 45 | 30 |
| <i>sgb102</i>              | 4187 | 42  | 36  | 14 | 12 | 33 |
| <i>smh101</i>              | 6114 | 19  | 19  | 9  | 5  | 26 |
| <i>smh104</i>              | 4784 | 20  | 3   |    |    | 0  |
| <i>srt101</i>              | 3571 | 36  | 41  | 22 | 16 | 39 |
| <i>vef101</i>              | 4747 | 20  | 5   | 2  | 1  | 20 |
| Empty vector <sup>a</sup>  | 161  | 94  | 71  | 20 | 10 | 14 |
| <i>B-Peru</i> <sup>a</sup> | 2973 | 56  | 27  | 21 | 8  | 30 |

3382 2494 1144 766

<sup>a</sup>These are control constructs. pMCG161 contains no IR insertion and pMCG2973 contains an IR targeting the



SOM Table II. Parental effects on transgene stability

|              | Sex of transmitting parent | Events | Segregating families analyzed | Resistant | Sensitive | Total | # Families with high frequency of resistant plants (P < 0.05)* | # Families with low frequency of resistant plants (P < 0.05)* |
|--------------|----------------------------|--------|-------------------------------|-----------|-----------|-------|----------------------------------------------------------------|---------------------------------------------------------------|
| Experiment 1 | Male                       | 22     | 22                            | 358       | 705       | 1063  | 0                                                              | 10                                                            |
|              | Female                     | 22     | 22                            | 444       | 594       | 1038  | 2                                                              | 5                                                             |
| Experiment 2 | Male                       | 73     | 146                           | 2225      | 2503      | 4728  | 1                                                              | 18                                                            |
|              | Female                     | 73     | 146                           | 2283      | 2371      | 4654  | 3                                                              | 10                                                            |

\*indicates values significantly different than expected based on chi square analysis

SOM Table III. Herbicide resistance frequencies in transgenic plants.

| Event   | Transgenic parent | Total plants | % BAR resistant plants | Transgene presence in S plants | Likely cause of reduced frequency of BAR resistant plants |
|---------|-------------------|--------------|------------------------|--------------------------------|-----------------------------------------------------------|
| 3544.16 | Female            | 11           | 0%                     | 3 / 8                          | Silencing                                                 |
| 5511.12 | Female            | 12           | 8%                     | 2 / 8                          | Silencing                                                 |
| 6238.33 | Female            | 15           | 0%                     | 2 / 8                          | Silencing                                                 |
| 5171.08 | Female            | 16           | 0%                     | 2 / 8                          | Silencing                                                 |
| 5825.01 | Female            | 17           | 24%                    | 2 / 8                          | Silencing                                                 |
| 3571.22 | Female            | 47           | 0%                     | 3 / 9                          | Silencing                                                 |
| 6321.01 | Female            | 48           | 0%                     | 2 / 10                         | Silencing                                                 |
| 2822.01 | Female            | 54           | 37%                    | 1 / 10                         | Silencing                                                 |
| 4322.05 | Female            | 56           | 41%                    | 4 / 9                          | Silencing                                                 |
| 3882.21 | Female            | 26           | 8%                     | 3 / 15                         | Silencing                                                 |
| 4281.13 | Female            | 26           | 27%                    | 2 / 15                         | Silencing                                                 |
| 3882.16 | Female            | 28           | 18%                    | 10 / 15                        | Silencing                                                 |
| 4281.26 | Female            | 29           | 17%                    | 4 / 15                         | Silencing                                                 |
| 3882.21 | Female            | 30           | 3%                     | 9 / 15                         | Silencing                                                 |
| 4162.03 | Female            | 30           | 13%                    | 5 / 15                         | Silencing                                                 |
| 4621.06 | Female            | 30           | 17%                    | 9 / 15                         | Silencing                                                 |
| 5171.01 | Female            | 30           | 7%                     | 9 / 15                         | Silencing                                                 |
| 4621.06 | Male              | 11           | 0%                     | 4 / 8                          | Silencing                                                 |
| 5832.33 | Male              | 14           | 0%                     | 4 / 8                          | Silencing                                                 |
| 5171.08 | Male              | 19           | 0%                     | 4 / 8                          | Silencing                                                 |
| 6321.03 | Male              | 38           | 0%                     | 6 / 10                         | Silencing                                                 |
| 4322.05 | Male              | 48           | 33%                    | 7 / 10                         | Silencing                                                 |
| 6432.27 | Male              | 48           | 33%                    | 2 / 10                         | Silencing                                                 |
| 6321.01 | Male              | 56           | 0%                     | 4 / 10                         | Silencing                                                 |
| 3882.03 | Male              | 20           | 25%                    | 6 / 15                         | Silencing                                                 |
| 2822.03 | Male              | 29           | 34%                    | 7 / 15                         | Silencing                                                 |
| 3882.03 | Male              | 30           | 50%                    | 4 / 15                         | Silencing                                                 |
| 4268.04 | Male              | 30           | 10%                    | 4 / 15                         | Silencing                                                 |
| 2758.04 | Female            | 11           | 0%                     | 1 / 8                          | Silencing and transmission                                |
| 3491.13 | Female            | 29           | 0%                     | 1 / 15                         | Silencing and transmission                                |
| 5297.15 | Female            | 29           | 3%                     | 1 / 15                         | Silencing and transmission                                |
| 3491.13 | Female            | 30           | 7%                     | 3 / 15                         | Silencing and transmission                                |
| 4187.11 | Female            | 30           | 17%                    | 3 / 15                         | Silencing and transmission                                |
| 4202.05 | Male              | 29           | 17%                    | 3 / 15                         | Silencing and transmission                                |
| 6180.10 | Female            | 10           | 20%                    | 0 / 7                          | Transmission                                              |
| 4268.04 | Female            | 17           | 24%                    | 0 / 8                          | Transmission                                              |
| 4721.12 | Female            | 18           | 0%                     | 0 / 8                          | Transmission                                              |
| 6432.27 | Female            | 47           | 40%                    | 0 / 10                         | Transmission                                              |
| 4268.14 | Female            | 49           | 67%                    | 0 / 10                         | Transmission                                              |
| 4281.19 | Female            | 50           | 24%                    | 0 / 10                         | Transmission                                              |
| 4281.18 | Female            | 54           | 43%                    | 0 / 10                         | Transmission                                              |
| 4281.18 | Female            | 28           | 21%                    | 0 / 15                         | Transmission                                              |
| 4322.05 | Female            | 28           | 4%                     | 0 / 15                         | Transmission                                              |
| 4268.23 | Female            | 29           | 7%                     | 0 / 15                         | Transmission                                              |
| 4268.23 | Female            | 29           | 24%                    | 0 / 15                         | Transmission                                              |
| 4271.20 | Female            | 29           | 14%                    | 0 / 15                         | Transmission                                              |
| 4281.03 | Female            | 29           | 7%                     | 0 / 15                         | Transmission                                              |

|         |        |    |     |        |              |
|---------|--------|----|-----|--------|--------------|
| 4281.03 | Female | 29 | 31% | 0 / 15 | Transmission |
| 4281.19 | Female | 29 | 10% | 0 / 15 | Transmission |
| 4291.18 | Female | 29 | 0%  | 0 / 15 | Transmission |
| 3944.17 | Female | 30 | 20% | 0 / 15 | Transmission |
| 4271.15 | Female | 30 | 7%  | 0 / 15 | Transmission |
| 4271.15 | Female | 30 | 7%  | 0 / 15 | Transmission |
| 4281.19 | Female | 30 | 7%  | 0 / 15 | Transmission |
| 4322.05 | Female | 30 | 7%  | 0 / 15 | Transmission |
| 5104.04 | Female | 30 | 10% | 0 / 15 | Transmission |
| 5104.13 | Female | 30 | 3%  | 0 / 15 | Transmission |
| 4301.09 | Male   | 11 | 0%  | 0 / 7  | Transmission |
| 5812.29 | Male   | 12 | 0%  | 0 / 8  | Transmission |
| 2758.09 | Male   | 13 | 0%  | 0 / 8  | Transmission |
| 4268.22 | Male   | 13 | 0%  | 0 / 6  | Transmission |
| 4795.12 | Male   | 14 | 0%  | 0 / 8  | Transmission |
| 2822.10 | Male   | 15 | 0%  | 0 / 8  | Transmission |
| 3944.17 | Male   | 15 | 0%  | 0 / 8  | Transmission |
| 6238.07 | Male   | 15 | 0%  | 0 / 8  | Transmission |
| 5171.09 | Male   | 17 | 24% | 0 / 8  | Transmission |
| 3361.08 | Male   | 18 | 17% | 0 / 8  | Transmission |
| 4716.02 | Male   | 18 | 28% | 0 / 8  | Transmission |
| 4281.06 | Male   | 44 | 5%  | 0 / 10 | Transmission |
| 4281.18 | Male   | 49 | 2%  | 0 / 10 | Transmission |
| 4268.20 | Male   | 53 | 42% | 0 / 10 | Transmission |
| 4281.19 | Male   | 54 | 0%  | 0 / 10 | Transmission |
| 3385.16 | Male   | 57 | 0%  | 0 / 9  | Transmission |
| 4268.23 | Male   | 28 | 25% | 0 / 15 | Transmission |
| 4268.23 | Male   | 29 | 10% | 0 / 15 | Transmission |
| 4268.23 | Male   | 30 | 13% | 0 / 15 | Transmission |
| 4291.10 | Male   | 30 | 3%  | 0 / 15 | Transmission |
| 4291.10 | Male   | 30 | 20% | 0 / 15 | Transmission |

SOM Table IV. Impact of selfing transgenic lines on herbicide resistance frequency.

| Line     | Self-pollinated progeny (1:2:1) |      | Out-crossed progeny (1:1) |     |
|----------|---------------------------------|------|---------------------------|-----|
|          | # R plants / total              | % R  | #R / total                | % R |
| 3571.004 | 15/19                           | 79%  | 8/20                      | 40% |
| 3571.009 | 14/20                           | 70%  | 8/20                      | 40% |
| 3571.003 | 13/19                           | 68%  | 11/19                     | 58% |
| 2822.006 | 38/60                           | 63%* | 8/17                      | 47% |
| 4268.004 | 12/20                           | 60%  | 7/16                      | 44% |
| 3361.005 | 9/19                            | 47%* | 9/19                      | 48% |

\*indicates values significantly lower than expected based on chi square analysis

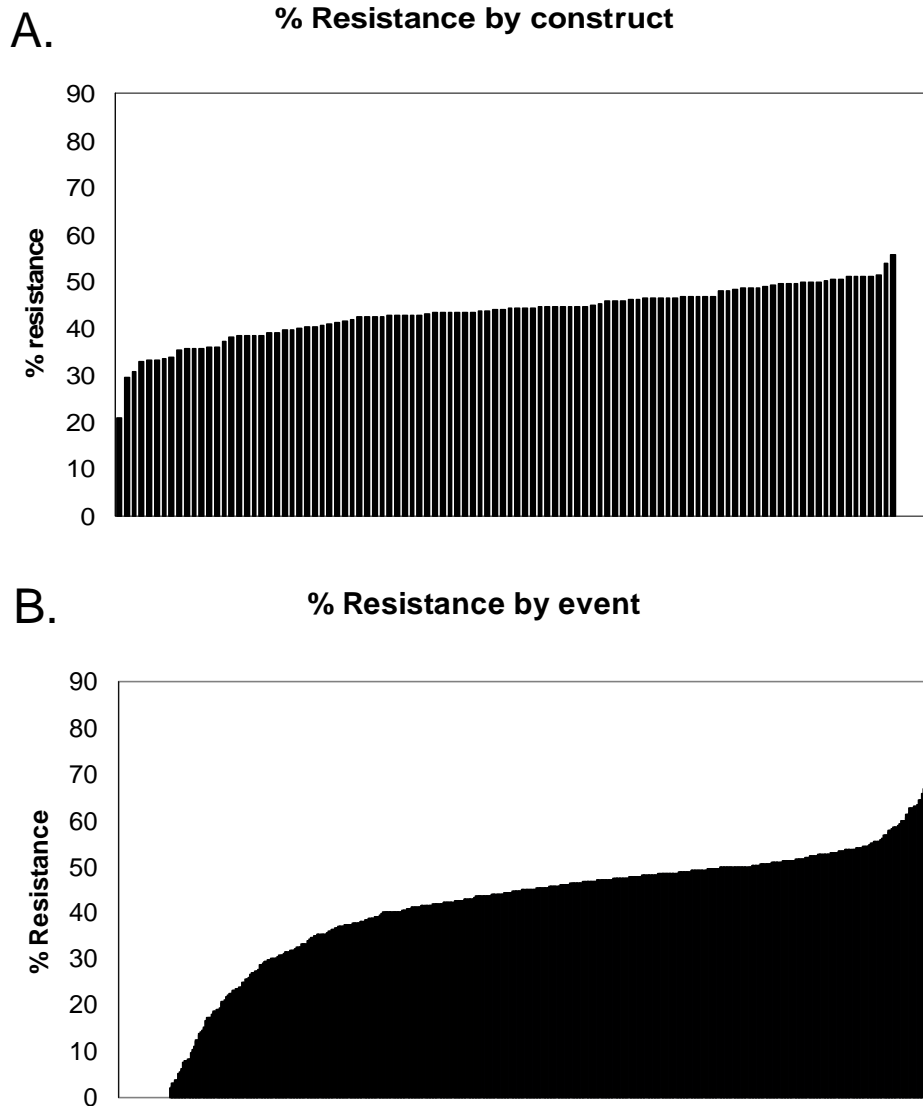

SOM Figure 1. Analysis of transgene stability by construct and by event. (A) The data from all field seasons was grouped based on the construct used to perform transformation. The percent resistant plants for multiple generations and constructs was tabulated for each event. (B) The percent resistant plants was determined for each event that included at least 8 plants. The data for each event can include scoring for multiple field seasons and multiple generations of transgenic plants. Note that some events show higher than expected frequencies of resistant plants while other events show less than expected frequencies of resistant plants.

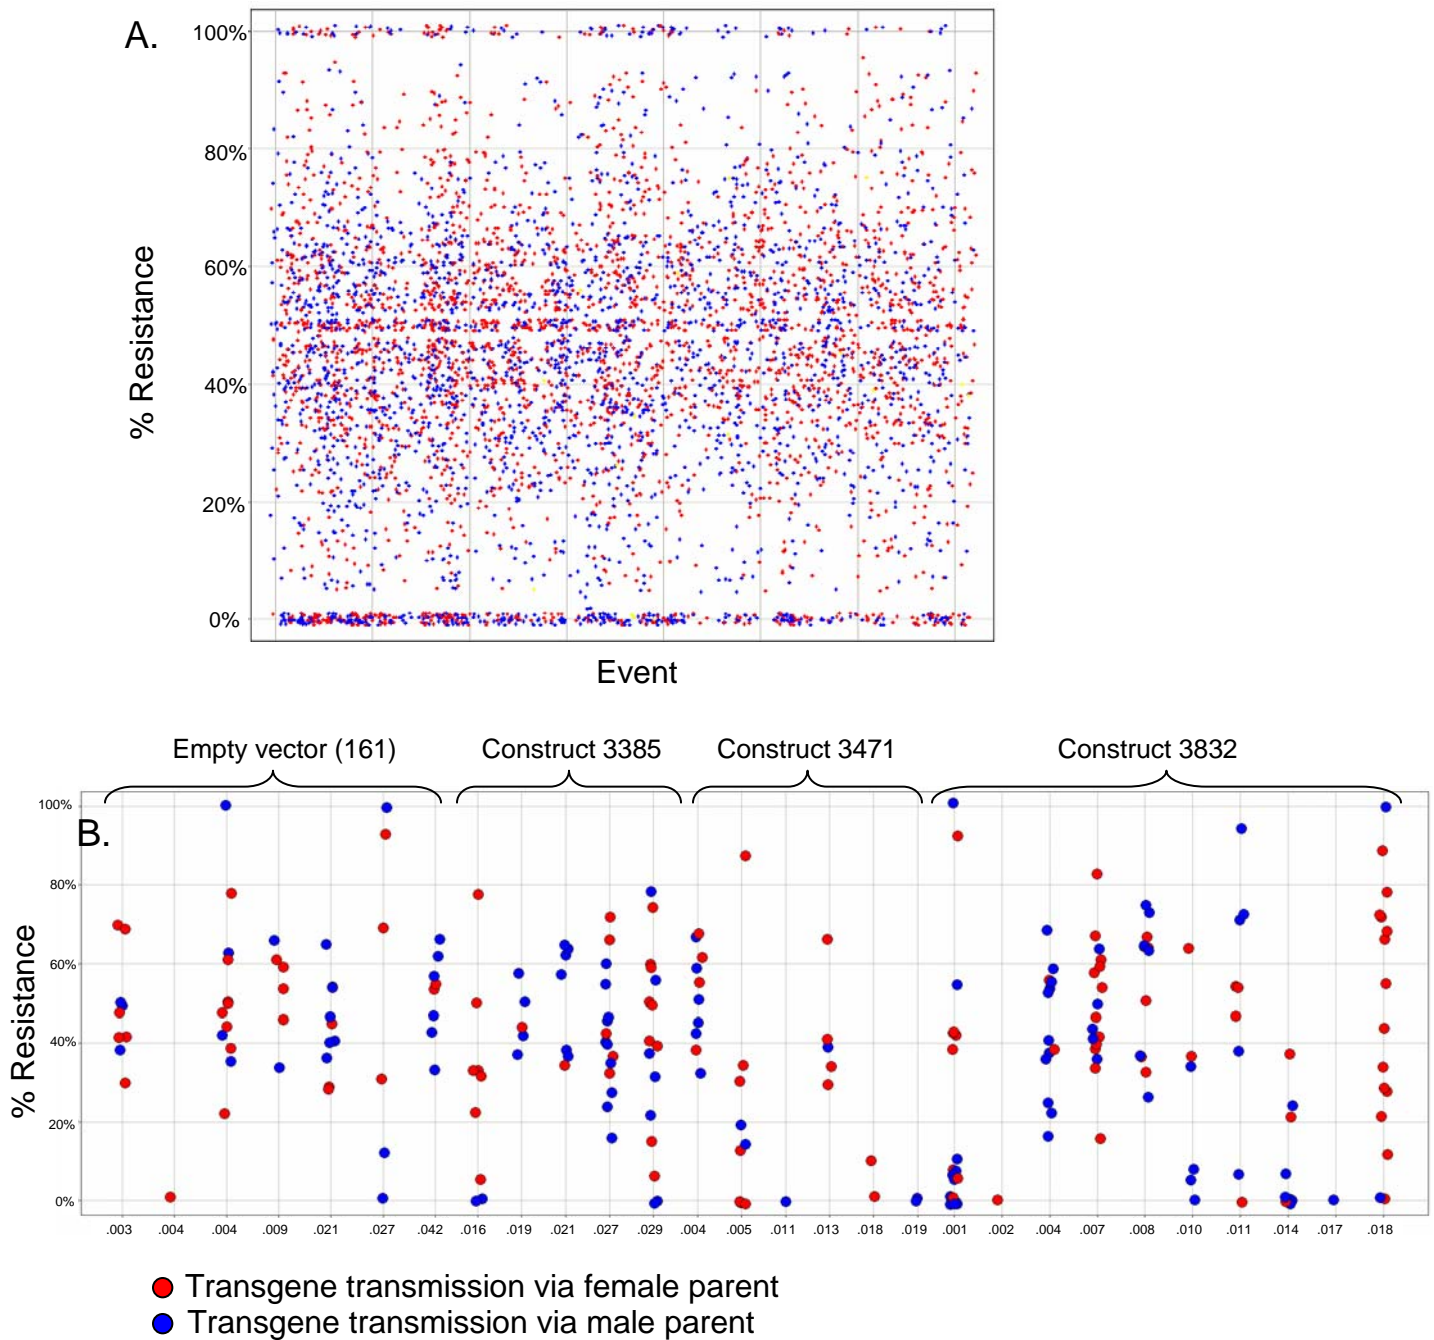

SOM Figure 2. Analysis of transgene stability by event. (A) The percent resistant plants for all rows with at least eight plants was determined and plotted on the y-axis. Each row was plotted along the x-axis according to the transgenic event number. The red points indicate rows in which the transgene was transmitted through the female parent and the blue points indicate rows in which the transgene was transmitted through the male parent. A small amount of “jitter” was applied to the plot to allow visualization of overlapping data points. (B) An expanded version of this plot was produced for the empty vector control and three different constructs. The event number is indicated along the bottom of the x-axis.

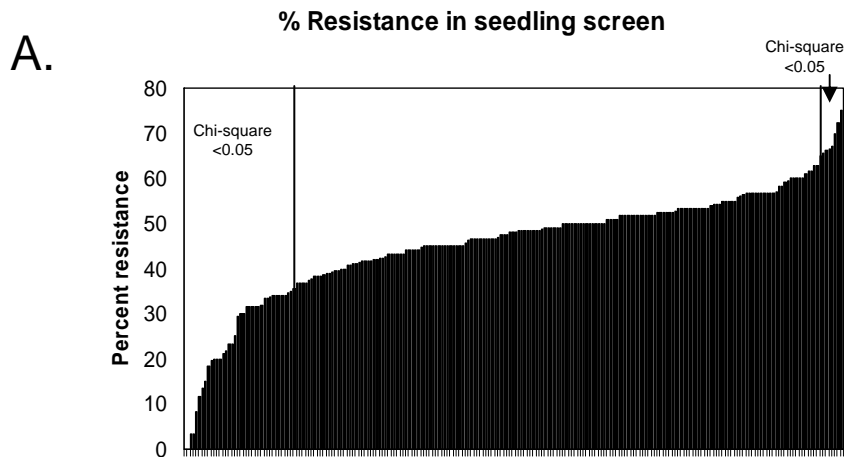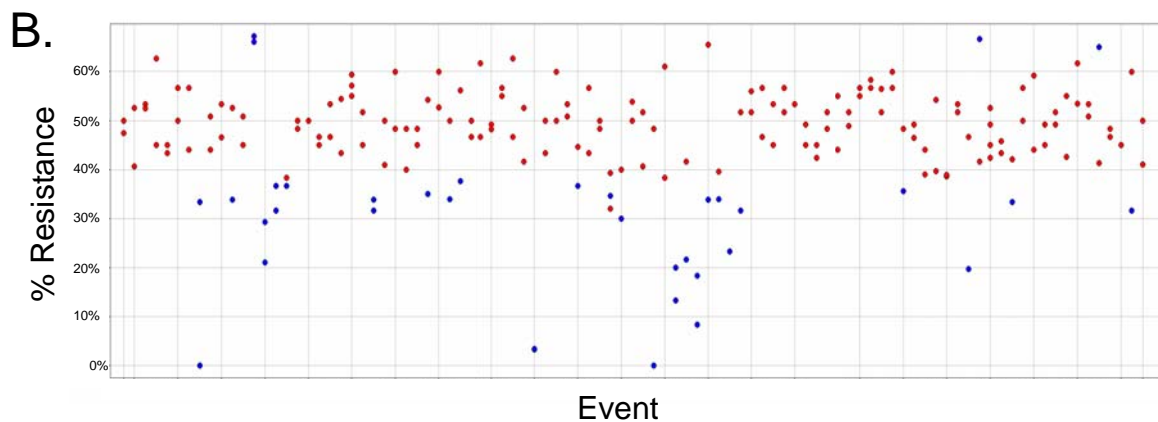

SOM Figure 3. Transgene stability in a controlled set of events. (A) Sixty seeds were planted and screened for herbicide resistance. The data are sorted according the percent resistance and plotted with a separate bar for each packet of seeds that were analyzed. The lines indicate the point at which the data are significantly different from expected at a chi-square value  $<0.05$ . (B) The correlation between the multiple generations or planting from the same event was assessed. Each vertical line along the X axis represents a different transgenic event. The y-axis indicates the percentage of plants that displayed BAR resistance for each row that was planted in the field. The blue spots indicate a chi-square significant value ( $P < 0.05$ ). Note that in many cases there is correlation between different rows of plants derived from the same event.
